# Supplementary material
Source: PubMed Central journal article supplement (PMC3413228)

## Supplemental data

**Supplemental Table 1. Sequences of primers used for qRT-PCR analysis**

|               | Forward (5'-3')           | Reverse(5'-3')          |
|---------------|---------------------------|-------------------------|
| Actin         | ACACTGTGCCCATCTACGAG      | CAGCACTGTGTTGGCATAGAG   |
| Perilipin 2   | GATTGAATTCGCCAGGAAGA      | TGGCATGTAGTCTGGAGCTG    |
| FAS           | TCCAAGACTGACTCGGCTACTGAC  | GCAGCCAGGTTCGGAATGCTATC |
| ACC1          | AGCTGATCCTGCGAACCT        | GCCAAGCGGATGTAAACT      |
| SCD1          | AAGCTCTACACCTGCCTCTTC     | GTGACTCCCGTCTCCAGTTCT   |
| DGAT1         | TCCGTCCAGGGTGGTAGTG       | TGAACAAAGAATCTTGCAGACGA |
| DGAT2         | CTGGCTGATAGCTGCTCTCTACTTC | TGTGATCTCCTGCCACCTTTC   |
| PPAR $\alpha$ | ACGGCAATGGCTTTATCA        | CGCTGCGTCGGACTCGGT      |
| ACC2          | GTGTTGGACTCTCAAGGACAG     | GGATGATGGGGAGTTTTCCA    |
| CPT1          | ACCACTGGCCGCATGT          | CTCCATGGCGTAGTAGTTGCT   |
| CPT2          | ACCTGCTCGCTCAGGATAAAC     | CTTAGCAGCGGTGACGCCAGC   |
| COX4          | CGGCGTGACTACCCCTTG        | TGAGGGATGGGGCCATACA     |

**Supplemental Figure 1. Absence of Cideb and perilipin 2 increases the levels of perilipin 3 and perilipin 5 on lipid droplets.** (A) Western blot showing increased perilipin 2, perilipin3 and perilipin 5 protein levels on the lipid droplets from *Cideb*<sup>-/-</sup> (-/-) livers under fasting conditions. (B) Western blot showing decreased perilipin 5 and no change in perilipin 3 levels in the absence of perilipin 2 in wild-type and *Cideb*<sup>-/-</sup> livers under fasting conditions. (C) Knockdown of perilipin 2 increased perilipin3 and perilipin 5 protein levels on the lipid droplets from wild-type and *Cideb*<sup>-/-</sup> livers under fasting conditions.

**Supplemental Figure 2. Knockdown of perilipin 2 increases the levels of mature VLDL particles in the Golgi fractions from wild-type livers under fasting conditions.** Density distribution of apoB-containing lipoproteins in the Golgi with or without perilipin 2 knockdown. ApoB-containing lipoproteins were isolated from the luminal contents of the Golgi fractions by sucrose density gradient centrifugation. ApoB was immunoprecipitated from each fraction, separated by SDS-PAGE and assessed by fluorography. The labels at the top of the western blots are the measured densities, indicating the expected distributions of the lipoproteins. The intensity of each band was estimated using Bio-Rad Quantity One software. The results shown are representative of two independent experiments. Mice were fasted for 12 hr. IDL/LDL,

intermediate/low-density lipoproteins; HDL, high-density lipoproteins.

**Supplemental Figure 3. Perilipin 2 does not affect hepatic TAG accumulation and VLDL lipidation under fed conditions.** (A) Similar hepatic TAG levels with or without perilipin 2 in wild-type (+/+) and *Cideb*<sup>-/-</sup> (-/-) mice (n=3 each) under fed conditions. Data are the means ± SEM. (B-C) Knockdown of perilipin 2 does not increase mature VLDL particles accumulation in the Golgi fractions of wild-type (B) or *Cideb*<sup>-/-</sup> (C) mice under fed conditions. ApoB-containing lipoproteins were isolated from the luminal contents of the Golgi fractions by sucrose density gradient centrifugation. ApoB was immunoprecipitated from each fraction, separated by SDS-PAGE and assessed by fluorography. The labels at the top of the western blots are the measured densities, indicating the expected distributions of the lipoproteins. The intensity of each band was estimated using Bio-Rad Quantity One software. The results shown are representative of two independent experiments. Mice were sacrificed in fed conditions. IDL/LDL, intermediate/low-density lipoproteins; HDL, high-density lipoproteins.

# Figure S1

## A Lipid Droplet Protein

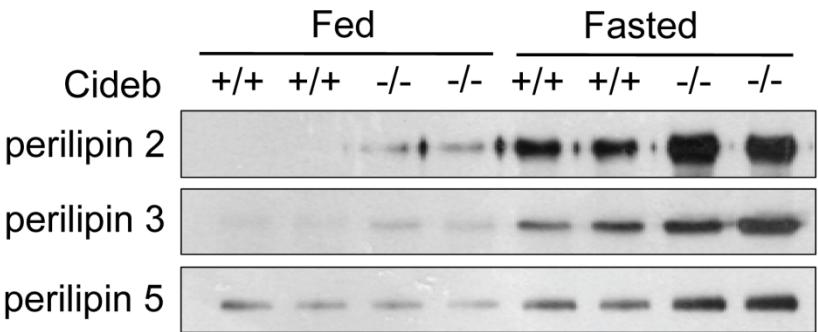

## B Total Liver Protein

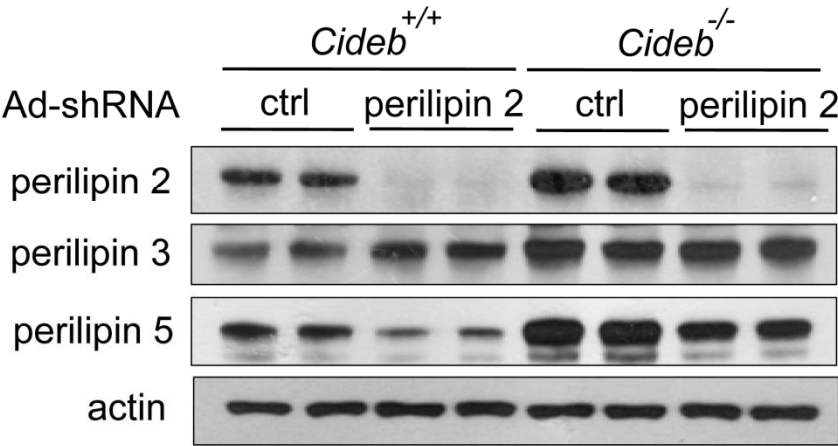

## C Lipid Droplet Protein

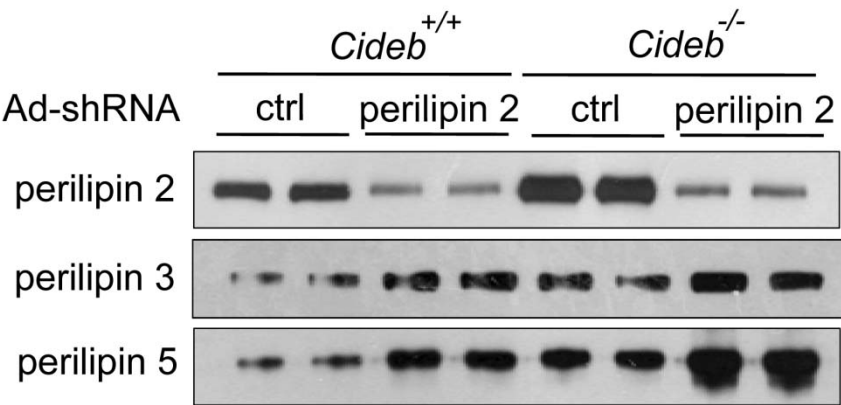

Figure S2

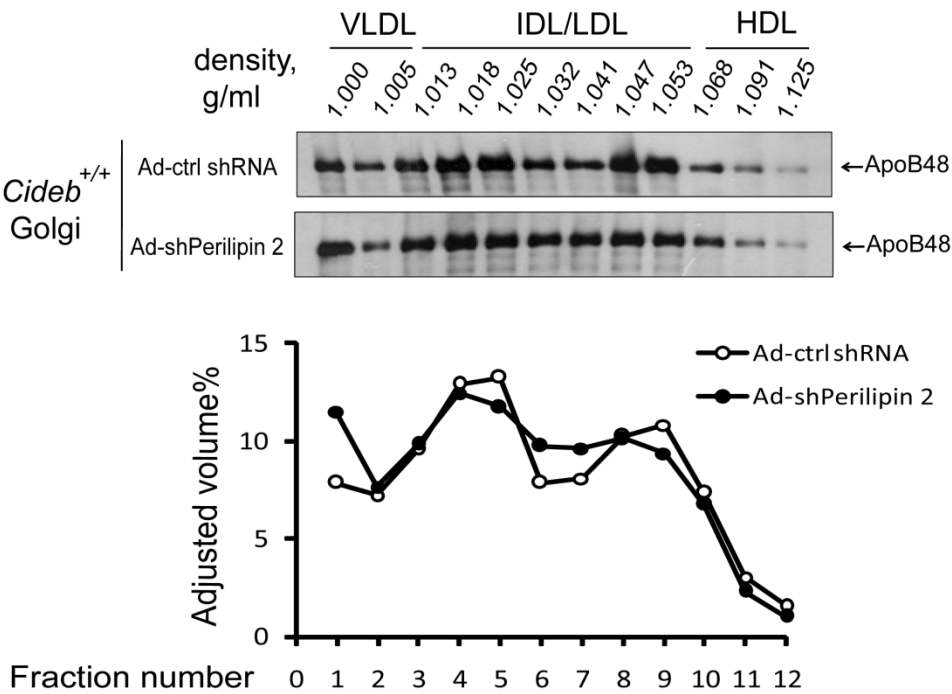

**Figure S3**

**A** Fed

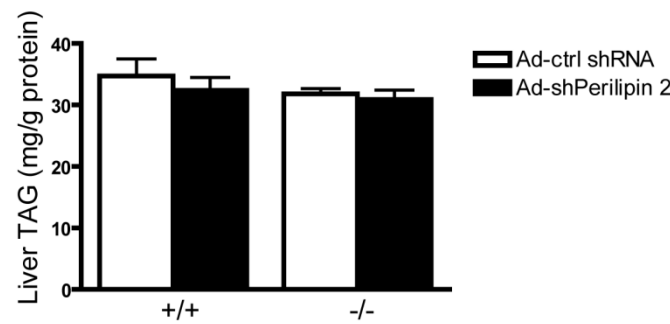

**B** Fed

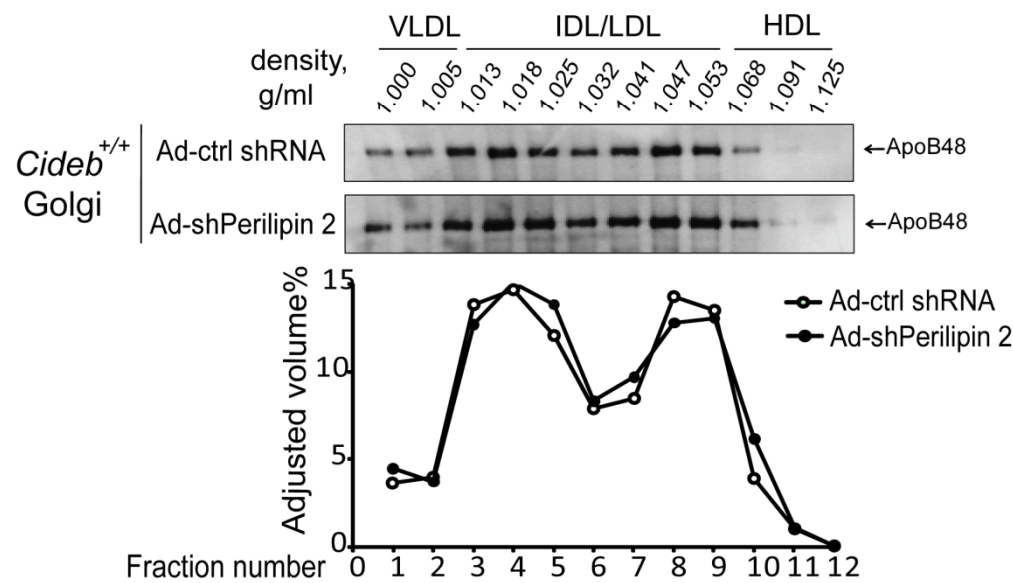

**C** Fed

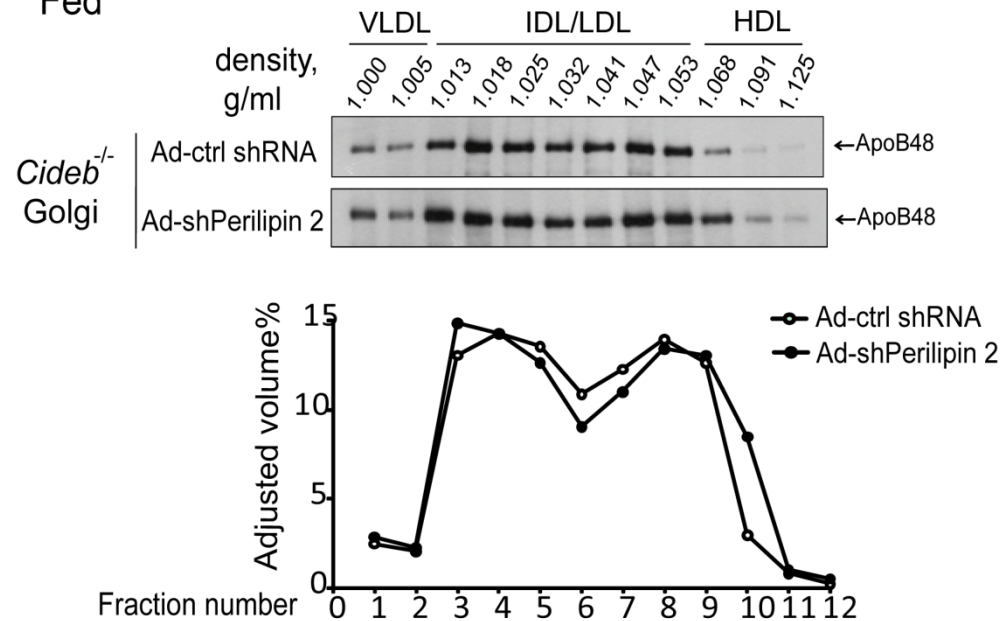

Supplement: supp_M026591_jlr.M026591-1.pdf [file supp_M026591_jlr.M026591-1.pdf]
